# Supplementary material for: Epsins Negatively Regulate Aortic Endothelial Cell Function by Augmenting Inflammatory Signaling
Source: MDPI journal article supplement (doi:10.3390/cells10081918), 2021-07-29
Supplement: s1 [file s1]

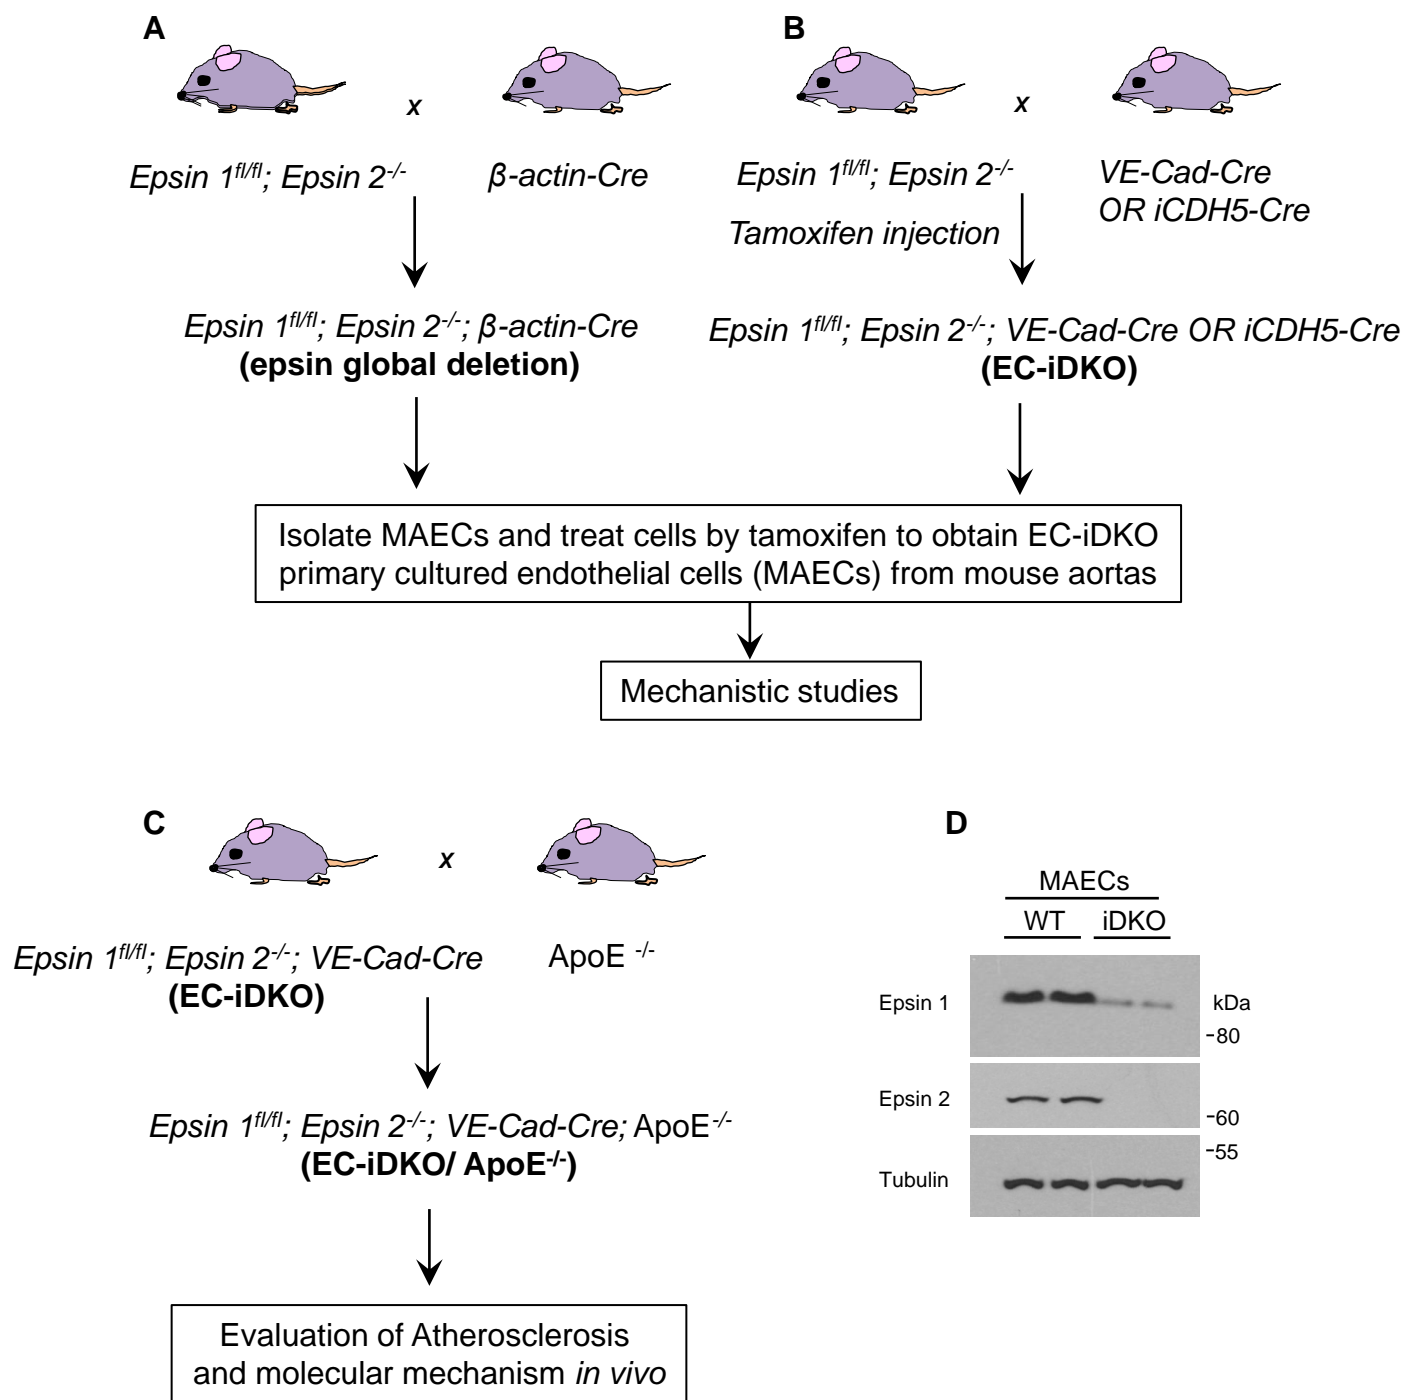

**Figure S1. Procedures to generate primary cultured mouse endothelial cells (MAECs) from aortas, and epsin mutant mice in the ApoE-null murine atherosclerosis model.**

(A) Global epsin double knock-out (DKO) under constitutive  $\beta$ -actin driven Cre. (B) Conditional DKO of epsins in endothelium was driven by the vascular endothelial (VE)-cadherin promoter. (C) Generation of epsin DKO mice in the ApoE-null mouse model. (D) Creation of epsin DKO MAECs in culture. Isolated cells were treated with 5  $\mu$ M tamoxifen for 4-5 days, followed by western blot analysis.

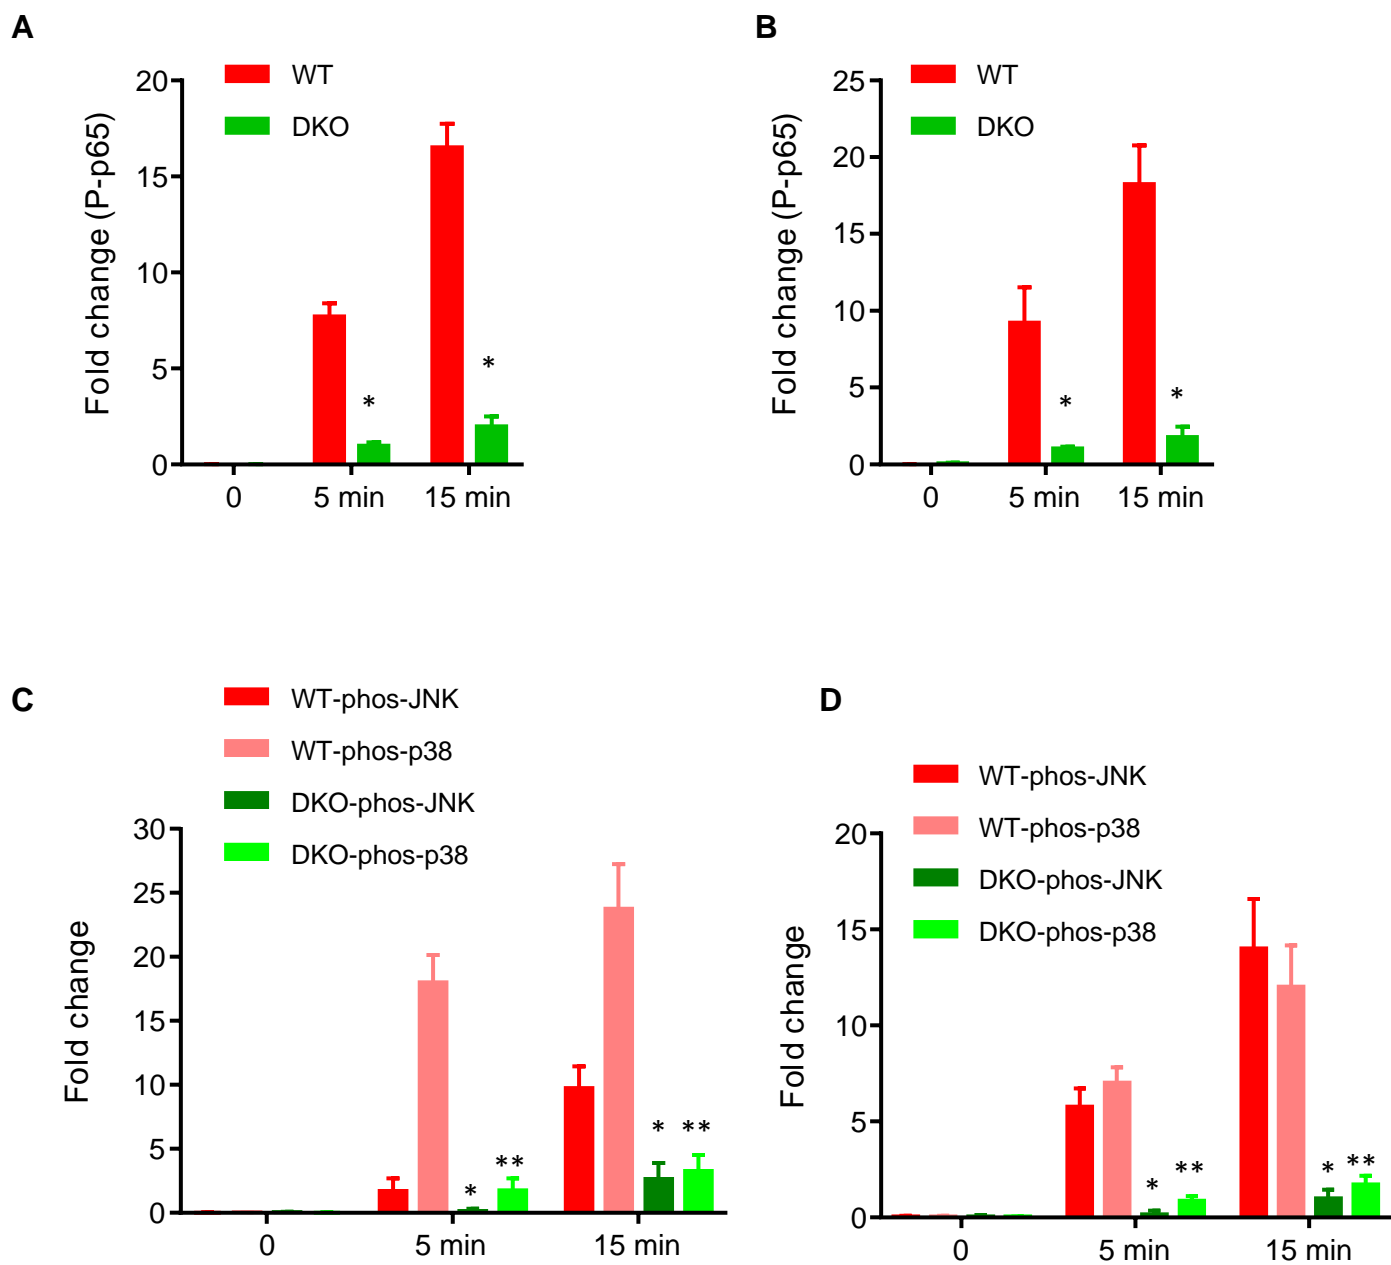

Figure S2. Quantification for Figure 1A to 1D.

(A) TNF $\alpha$ , phospho-p65; (B) LPS, phospho-p65; (C) TNF $\alpha$ , phospho-JNK and phospho-p38; (D) LPS, phospho-JNK and phospho-p38.

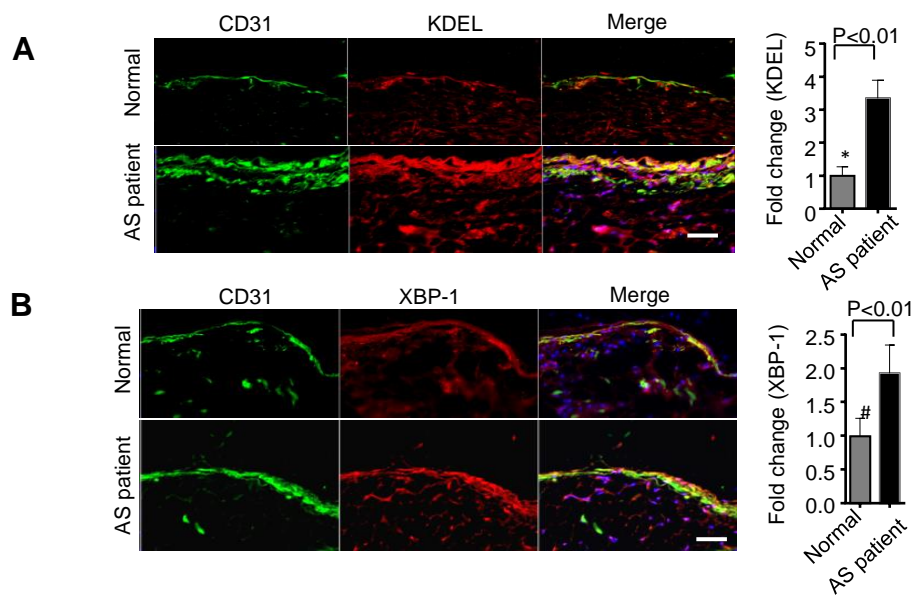

**Figure S3. ER stress markers are upregulated in the aortic arches of human atherosclerosis patients, and loss of epsins in ECs attenuates ER stress.**

(A, B) ER stress marker KDEL (A) and XBP-1 (B) are upregulated in atherosclerotic (AS) patients versus control patients by immunofluorescence staining (n=4-5 in each group). Scale bar: 100  $\mu$ m.

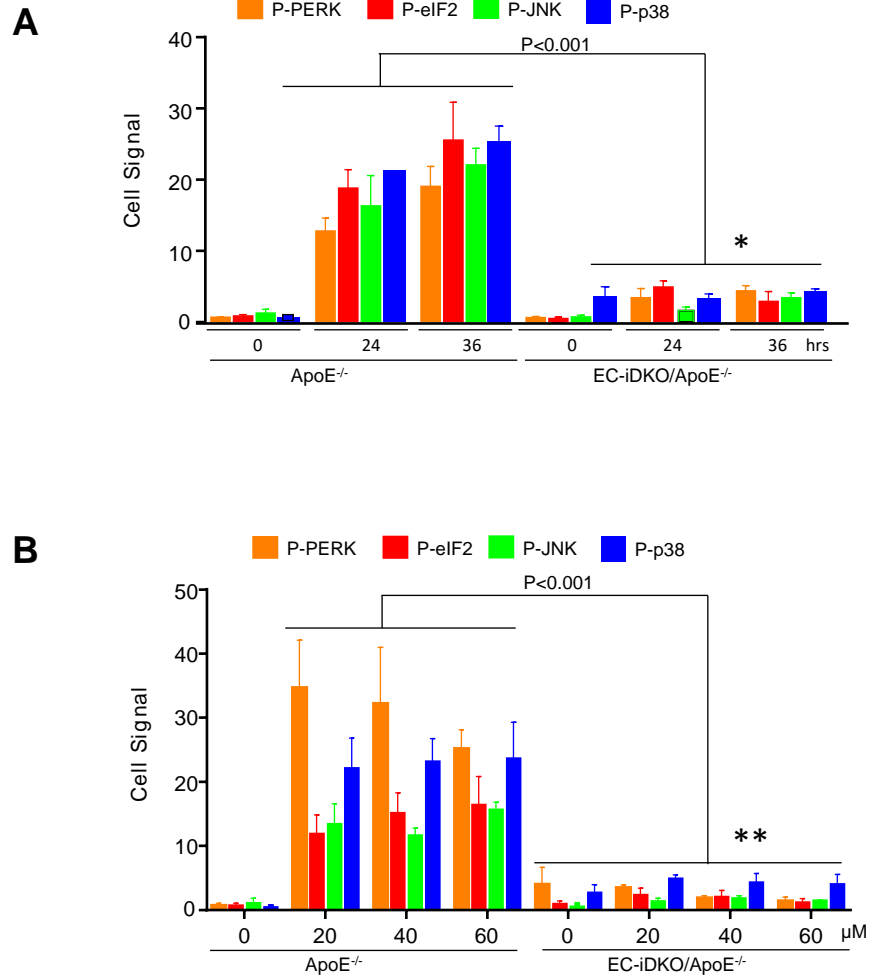

**Figure S4. Quantification for Figure 2E and 2F.**

MAECs were isolated from ApoE<sup>-/-</sup> or DKO/ApoE<sup>-/-</sup> mice aortas. Cells were treated with 7-KC in indicated time points (7-KC at 50 μM) or concentrations at 0, 20, 40 and 60 μM for 36 hours. Statistical analysis and quantification was shown in (A) and (B) respectively (n=4). *P* values are indicated in the histograms.

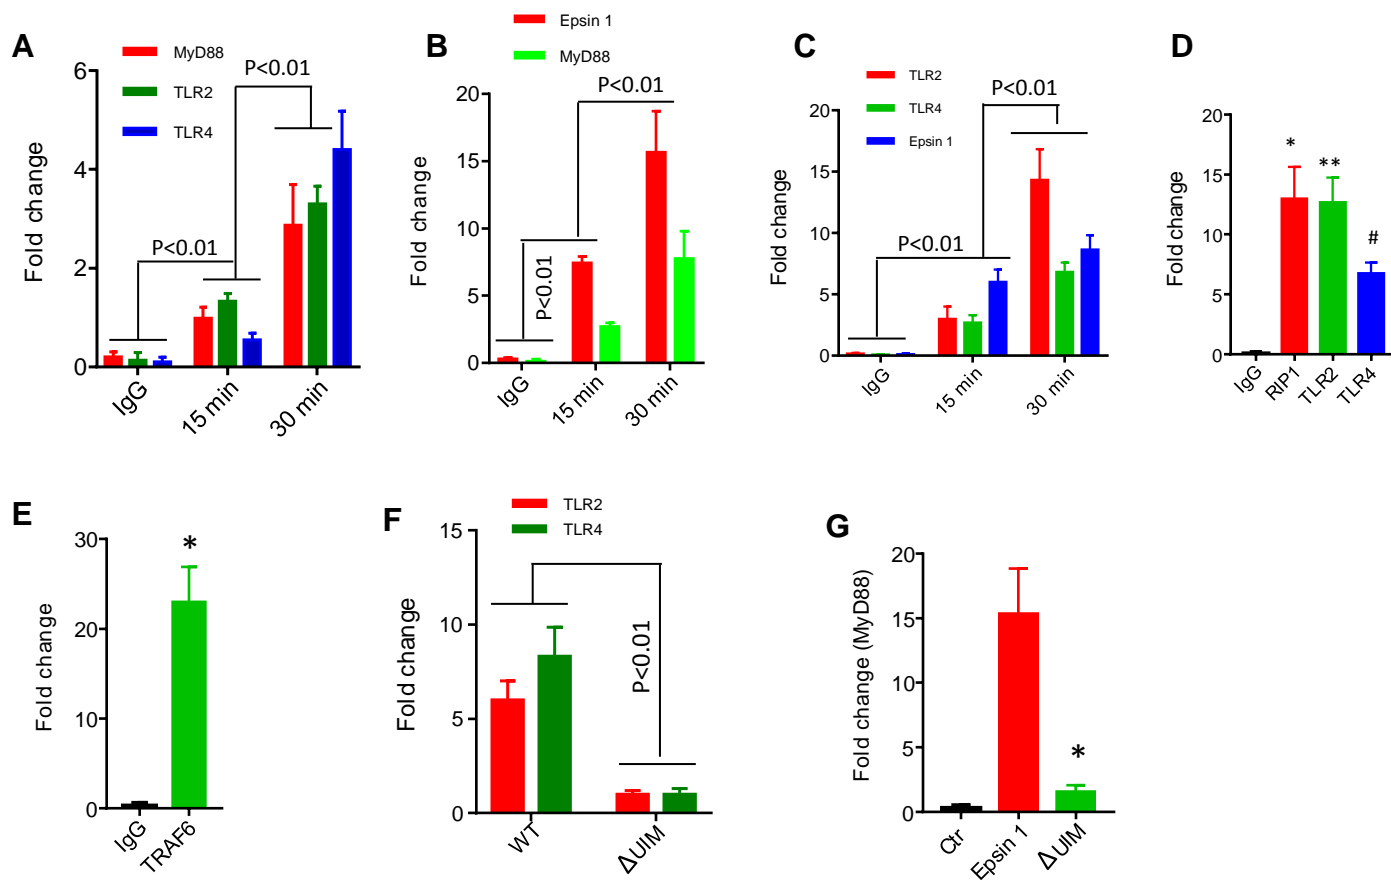

**Figure S5. Quantification for Figure 6A to 6G.**

(A) Wild type MAECs were treated with 100 ng/ml LPS for 15 or 30 min, cells were lysed for immunoprecipitation (IP) with epsin 1 antibody, and blotted with MyD88 or TLR2/4 antibodies.  $n=5$ .  $P<0.01$ ; MyD88, TLR2 and TLR4 were quantified. (B) Treatment as in (A), while IP with TLR4 antibody, and blotted with Epsin 1, MyD88 and TLR4 antibodies.  $n=5$ .  $P<0.01$ ; Epsin 1 and MyD88 were quantified. (C) Treatment as in (A), while IP with MyD88 antibody, and blotted with Epsin 1 and TLR2/4 antibodies.  $n=5$ .  $P<0.01$ ; TLR2, TLR4 and Epsin 1 were quantified. (D) MAECs were treated with 100 ng/ml LPS for 30 min, IP with Epsin 1 antibody and blotted with RIP1 or TLR2/4 antibody.  $n=5$ . \*, \*\*, #  $P<0.01$ ; RIP1, TLR2 and TLR4 were quantified. (E) MAECs were treated with LPS for 30 min, IP with Epsin 1 antibody and blotted with TRAF6.  $n=5$ . \*  $P<0.001$ ; TRAF6 was quantified. (F) Epsin 1<sup>wt</sup> (HA tag) or epsin 1<sup>ΔUIM</sup> (HA tag) were transfected to wt MAECs by electroporation separately. After 30 hours, IP with HA antibody and blotted with HA or TLR2/4 antibody.  $n=3$ . WT vs. epsin 1<sup>ΔUIM</sup>; TLR2 and TLR4 were quantified. (G) Epsin 1<sup>wt</sup> (HA tag) or epsin 1<sup>ΔUIM</sup> (HA tag) were co-transfected to MAECs with MyD88 (Flag tag) by electroporation separately. After 30 hours, cells were lysed and IP with HA, followed by blotting with Flag or HA antibody. \*  $P<0.001$ , Epsin 1 vs. epsin 1<sup>ΔUIM</sup>.

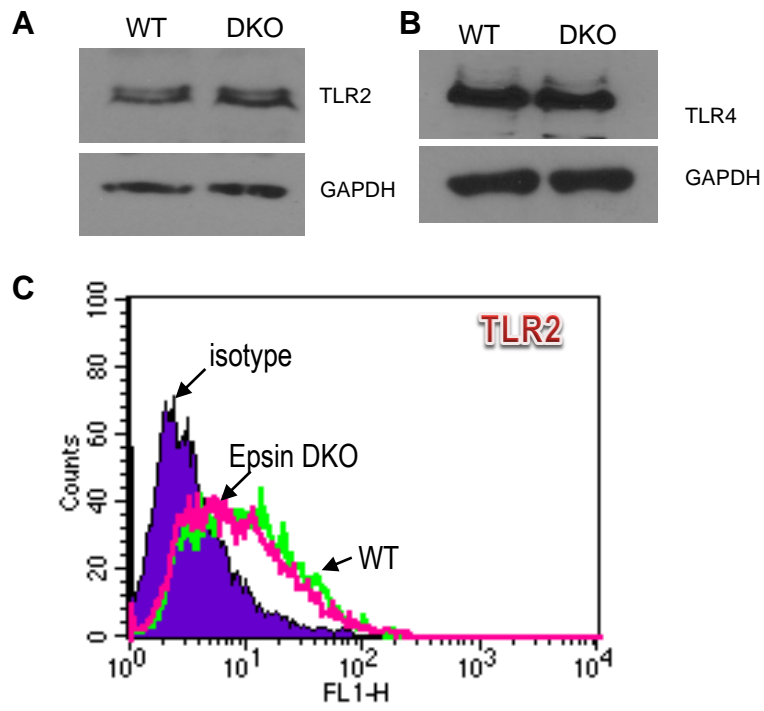

**Figure S6. Loss of epsins in the endothelium did not affect the expression of TLR2 or TLR4.**

(A, B) TLR2 or TLR4 expression in the MAECs of WT and DKO (n=5). (C) TLR2 is not affected by epsin loss in MAECs using flow cytometric analyses (n=5).

Table S1: qPCR primers used in this study.

| Mouse Gene                      | Primer sequence                                                                       |
|---------------------------------|---------------------------------------------------------------------------------------|
| <b>ICAM-1</b>                   | Forward: GTG GTG AAG TCT GT CAA ACA GGA G<br>Reverse: CCT CCT GAG CCT TCT GTA ACT TGT |
| <b>VCAM-1</b>                   | Forward: CTC TCC CAG GAA TAC AAC GAT CTC<br>Reverse: GAC TCC AGA GTC TTC CAT CCT CAT  |
| <b>P-selectin</b>               | Forward: ATC CAG GAA GCT CTG ACG TAC TTG<br>Reverse: CAG CGT TAG TGA AGA CTC CGT ATG  |
| <b>E-selectin</b>               | Forward: GTT TGA CTG TGT GGA AGG GTA CAG<br>Reverse: GCT CAC AGG TGA AGT TAC AGG ATG  |
| <b>MCP-1</b>                    | Forward: CCA CTC ACC TGC TGC TAC TCA<br>Reverse: TGG TGA TCC TCT TGT AGC TCT CC       |
| <b>IFN-<math>\gamma</math></b>  | Forward: AAG TGG CAT AGA TGT GGA AGA AA<br>Reverse: TTG ACC TCA AAC TTG GCA ATA CT    |
| <b>TNF<math>\alpha</math></b>   | Forward: ACG GCA TGG ATC TCA AAG AC<br>Reverse: AGA TAG CAA ATC GGC TGA CG            |
| <b>IL-6</b>                     | Forward: CTG GAG TAC CAT AGC TAC CTG GA<br>Reverse: CTT AGC CAC TCC TTC TGT GAC TC    |
| <b>IL-1<math>\beta</math></b>   | Forward: TAC AAG GAG AAC CAA GCA ACG A<br>Reverse: GCT TGT GAG GTG CTG ATG TAC C      |
| <b>IL-10</b>                    | Forward: GCC ACA TGC TCC TAG AGC TG<br>Reverse: CAG CTG GTC CTT TGT TTG AAA           |
| <b>GAPDH</b>                    | Forward: CTC ATG ACC ACA GTC CAT GC<br>Reverse: CAC ATT GGG GGT AGG AAC AC            |
| <b><math>\beta</math>-actin</b> | Forward: GAT CAA GAT CAT TGC TCC TCC TG<br>Reverse: AGG GTG TAA AAC GCA GCT CA        |

*Table S2: Body weight, blood glucose and lipid profiles of ApoE<sup>-/-</sup> and EC-iDKO/ApoE<sup>-/-</sup> mice*

| Items               | ApoE <sup>-/-</sup> | EC-iDKO/ApoE <sup>-/-</sup> | P value (t test) |
|---------------------|---------------------|-----------------------------|------------------|
| Body weight (g)     | 27.4±2.12           | 24.8±1.13                   | 0.4123           |
| Glucose (mg/dL)     | 127±6.90            | 128±14.8                    | 0.6119           |
| Cholesterol (mg/dL) | 684.8±59.5          | 662±73.10                   | 0.9419           |
| Triglyceride (mM)   | 1.367±0.49          | 1.24±0.88                   | 0.7463           |

\*\*\* n=8-10 in each group
